# Supplementary material for: Neighborhood Environmental Factors and Physical Activity Status among Rural Older Adults in Japan
Source: MDPI journal article supplement (doi:10.3390/ijerph18041450), 2021-02-04
Supplement: s1 [file s1]

Table S1: Correlation between neighborhood environmental factors.

|                             | <b>Slope</b> | <b>Distance to<br/>community<br/>center (CC)</b> | <b>Bus stop<br/>density</b> | <b>Intersection<br/>density</b> | <b>Residential<br/>density</b> |
|-----------------------------|--------------|--------------------------------------------------|-----------------------------|---------------------------------|--------------------------------|
| <b>Slope</b>                | 1            | 0.34                                             | -0.4                        | -0.65                           | -0.49                          |
| <b>Distance to CC</b>       | 0.34         | 1                                                | -0.41                       | -0.44                           | -0.35                          |
| <b>Bus stop density</b>     | -0.4         | -0.41                                            | 1                           | 0.76                            | 0.7                            |
| <b>Intersection density</b> | -0.65        | -0.44                                            | 0.76                        | 1                               | 0.73                           |
| <b>Residential density</b>  | -0.49        | -0.35                                            | 0.7                         | 0.73                            | 1                              |
