# Supplementary material for: Neighborhood Environmental Factors and Physical Activity Status among Rural Older Adults in Japan
Source: MDPI journal article supplement (doi:10.3390/ijerph18041450), 2021-02-04
Supplement: s1 [file s1]

Table S2: Cox proportional hazard model for physical inactivity by neighborhood environmental factors - stratified analysis by residential municipality and age group.

|                                                                   | <b>Unnan<br/>60-74<br/>n = 706</b> | <b>Unnan<br/>75+<br/>n = 257</b> | <b>Oki<br/>60-74<br/>n = 365</b> | <b>Oki<br/>75+<br/>n = 203</b> | <b>Onan<br/>60-74<br/>n = 680</b> |
|-------------------------------------------------------------------|------------------------------------|----------------------------------|----------------------------------|--------------------------------|-----------------------------------|
|                                                                   | <b>HR (95%CI)</b>                  | <b>HR (95%CI)</b>                | <b>HR (95%CI)</b>                | <b>HR (95%CI)</b>              | <b>HR (95%CI)</b>                 |
| <b>Slope (ref. 1st, lowest)</b>                                   |                                    |                                  |                                  |                                |                                   |
| 2nd                                                               | 1.17<br>(0.89, 1.46)               | 1.30<br>(0.76, 1.85)             | 1.55*<br>(1.08, 2.02)            | 1.89<br>(0.82, 2.97)           | 0.88<br>(0.57, 1.20)              |
| 3rd                                                               | 0.88<br>(0.60, 1.17)               | 1.27<br>(0.72, 1.81)             | 1.74*<br>(1.27, 2.21)            | 1.61<br>(0.58, 2.65)           | 1.18<br>(0.86, 1.50)              |
| 4th<br>(highest)                                                  | 0.91<br>(0.60, 1.23)               | 1.49<br>(0.99, 1.99)             | 0.89<br>(0.27, 1.50)             | 3.13*<br>(2.09, 4.16)          | 0.82<br>(0.53, 1.10)              |
| <b>Distance to community center (ref. 1<sup>st</sup>, lowest)</b> |                                    |                                  |                                  |                                |                                   |
| 2nd                                                               | 1.17<br>(0.89, 1.45)               | 0.55<br>(0.03, 1.06)             | 1.09<br>(0.59, 1.60)             | 0.48<br>(-0.58, 1.54)          | 0.94<br>(0.70, 1.26)              |
| 3rd                                                               | 0.95<br>(0.66, 1.23)               | 0.69<br>(0.25, 1.14)             | 1.06<br>(0.50, 1.62)             | 0.52<br>(-0.60, 1.64)          | 0.95<br>(0.70, 1.27)              |
| 4th<br>(highest)                                                  | 0.92<br>(0.60, 1.25)               | 0.72<br>(0.17, 1.27)             | 1.03<br>(0.55, 1.51)             | 0.73<br>(-0.08, 1.54)          | 0.66*<br>(0.47, 0.93)             |

Note: All models for each municipality and age group adjusted for sex, smoking drinking, BMI, musculoskeletal disorders. \*p<0.05. There were no subjects >= 75 years old in Onan.
