# Supplementary material for: Neighborhood Environmental Factors and Physical Activity Status among Rural Older Adults in Japan
Source: Int J Environ Res Public Health. 2021 Feb 4;18(4):1450. doi: 10.3390/ijerph18041450 (PMC7913898; doi:10.3390/ijerph18041450)
Supplement: Supplementary file 1 [file ijerph-18-01450-s001.zip]

Archive with 8 entries (8 files):
- Table_S1.pdf
- Table_S2.pdf
- Figure_S1_5.pdf
- Figure_S1.png
- Figure_S2.png
- Figure_S3.png
- Figure_S4.png
- Figure_S5.png
